# Supplementary material for: SERS determination of protease through a particle-on-a-film configuration constructed by electrostatic assembly in an enzymatic hydrolysis reaction
Source: Royal Society of Chemistry journal article supplement (doi:10.1039/c6ra15679g), 2016-01-01
Supplement: c6ra15679g1.pdf [file c6ra15679g1.pdf]

Supporting information for

## SERS determination of protease through a particle-on-a-film configuration constructed by electrostatic assembly in enzymatic hydrolysis reaction

Liyuan Yang, Tong Wu, Cuicui Fu, Gang Chen, Shuping Xu,\* Weiqing Xu

State Key Laboratory of Supramolecular Structure and Materials, Institute of Theoretical Chemistry, Jilin University, 2699 Qianjin Ave., Changchun 130012, P. R. China E-mail: xusp@jlu.edu.cn

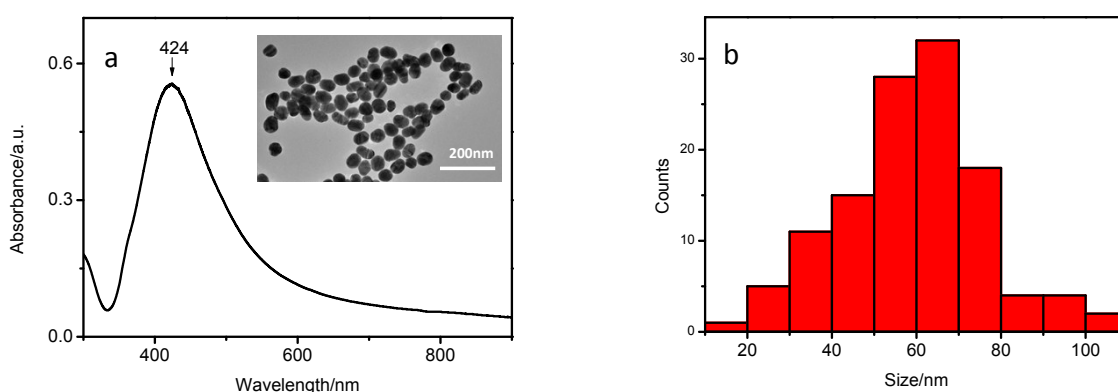

Fig. S1 (a) UV-vis spectra of Ag NPs. Insert is the TEM image of the Ag NPs. (b) Size distribution of the Ag NPs used in this work.

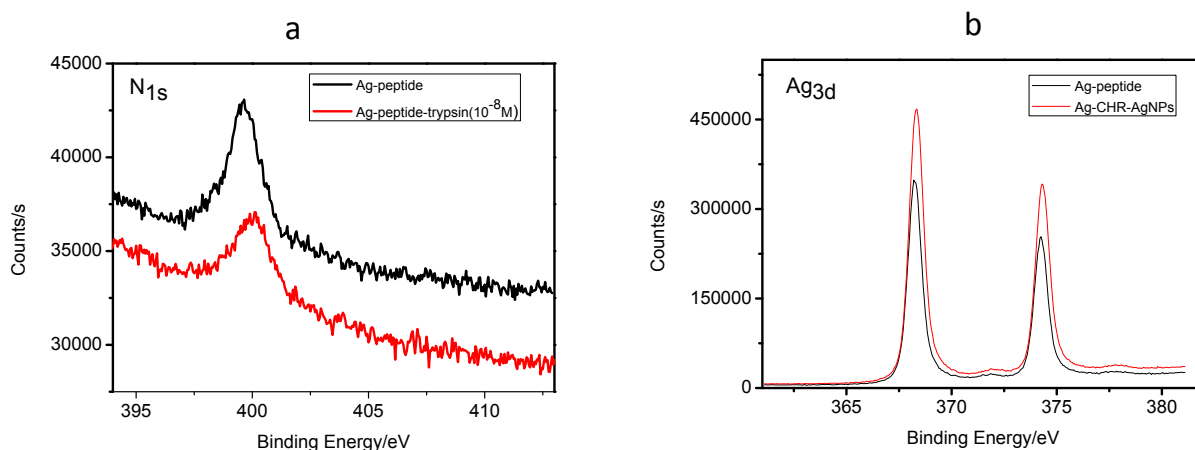

Fig. S2 (a) XPS spectra of  $N_{1s}$  of the CG-6 on an Ag film before (black) and after trypsin sensing (red). XPS spectra of  $Ag_{3d}$  of the CG-6 on an Ag film (black) and the CG-6 on an Ag NPs-on-an Ag film after responding for trypsin (red).

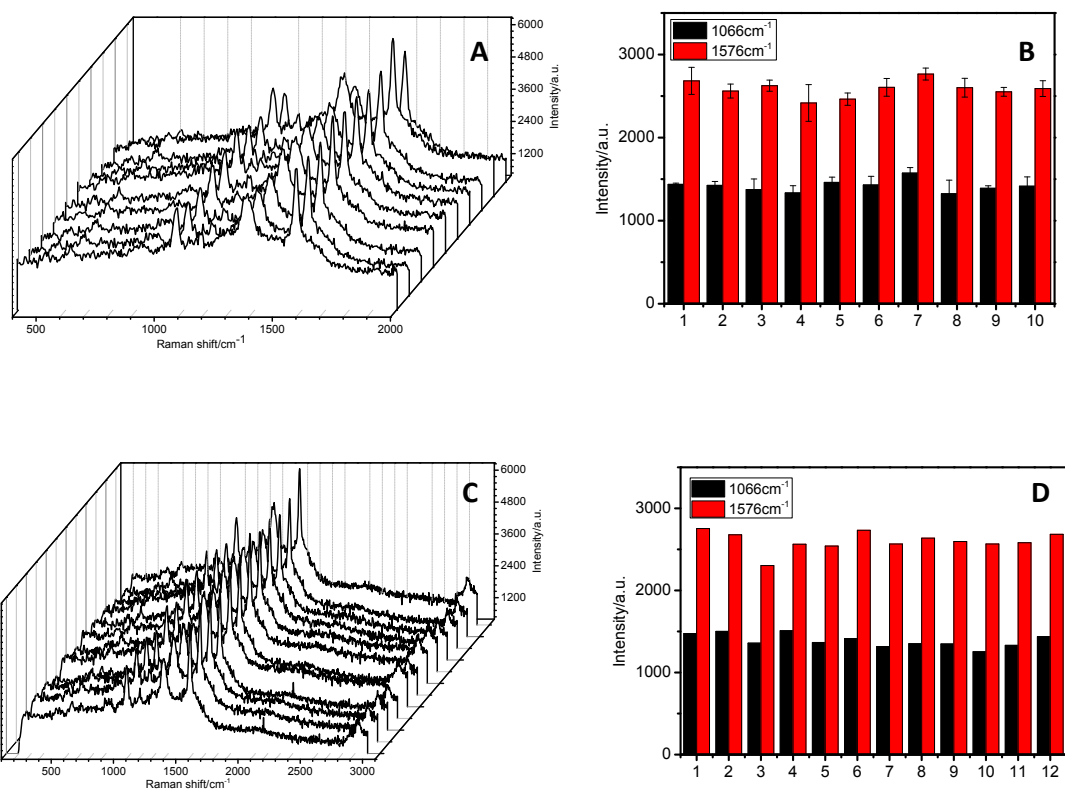

Fig. S3 (A) Mean SERS spectra from randomly selected 10 trials. While each mean spectrum is from three spectra of the same sample. (B) The intensities of SERS spectra at 1066  $\text{cm}^{-1}$  and 1576  $\text{cm}^{-1}$  on different trials. (C) SERS spectra from randomly selected 12 points from the same chip. (D) The intensities of SERS spectra at 1066 and 1576  $\text{cm}^{-1}$  on the same chip.

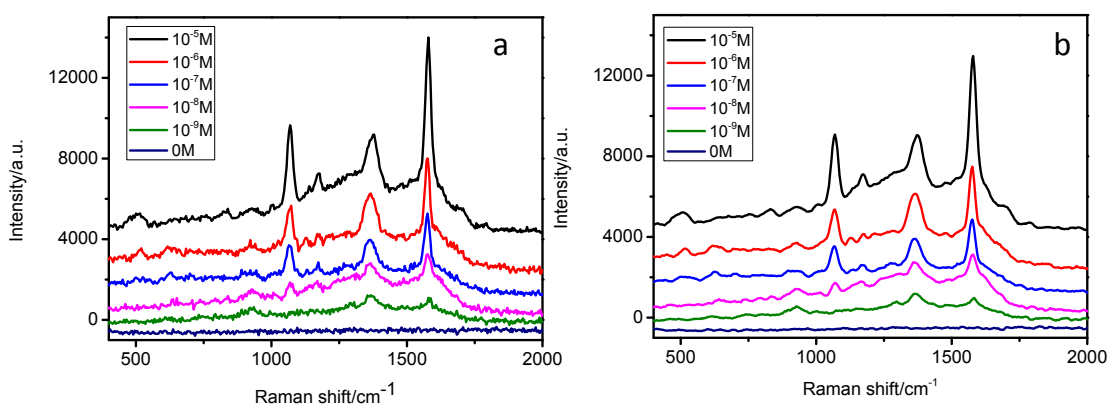

Fig. S4 SERS spectra of 4-MBA modified Ag film incubated with CG-6 treated with different amounts of trypsin before (a) and after (b) smoothing.

Table S1. Measurement of trypsin in 1 % serum by this method.

| Trypsin(M)           | Real Value | Measured Value | Recovery (%) |
|----------------------|------------|----------------|--------------|
| $1.0 \times 10^{-6}$ | 4047       | 3699           | 91.4         |
| $1.0 \times 10^{-7}$ | 2522       | 2280           | 90.4         |
| $1.0 \times 10^{-8}$ | 1231       | 1035           | 84.7         |
| $1.0 \times 10^{-9}$ | 497        | 432            | 86.9         |

Table S2 Intra-day and inter-day repeatabilities of the proposed procedure.

| Measurement | Intensity at $1076 \text{ cm}^{-1}$ (Counts) |         |         |         |         |         | SD   | RSD   |
|-------------|----------------------------------------------|---------|---------|---------|---------|---------|------|-------|
|             | Trial 1                                      | Trial 2 | Trial 3 | Trail 4 | Trial 5 | Average |      |       |
| Intra-day   | 2705                                         | 2682    | 2603    | 2746    | 2648    | 2677    | 48.8 | 1.82% |
| Inter-day   | 2499                                         | 2475    | 2346    | 2355    | 2503    | 2436    | 70.2 | 2.88% |
